# Supplementary material
Source: MDPI journal article supplement (https://www.mdpi.com/2227-9040/10/3/115)
Supplement: s1 [file s1]

# Perchlorate Solid-Contact Ion-Selective Electrode Based on Dodecabenzylbambus[6]Uril

Petra Itterheimová <sup>1,2</sup>, Johan Bobacka <sup>3</sup>, Vladimír Šindelář <sup>1,4</sup> and Přemysl Lubal <sup>1,\*</sup>

<sup>1</sup> Department of Chemistry, Faculty of Science, Masaryk University, Kamenice 5, 625 00 Brno, Czech Republic; p.itterheimova@gmail.com (P.I.); sindelar@chemi.muni.cz (V.Š.)

<sup>2</sup> Department of Bioanalytical Instrumentation, Institute of Analytical Chemistry, Czech Academy of Sciences, 60200 Brno, Czech Republic

<sup>3</sup> Laboratory of Molecular Science and Engineering, Faculty of Science and Engineering, Åbo Akademi University, Henriksgatan 2, 20500 Turku-Åbo, Finland; johan.bobacka@abo.fi

<sup>4</sup> Research Centre for Toxic Compounds in the Environment (RECETOX), Faculty of Science, Masaryk University, Kamenice 5, 625 00 Brno, Czech Republic

\* Correspondence: lubal@chemi.muni.cz; Tel.: +420-54949-5637

Received: date: 7 February 2022; Accepted: 14 March 2022; Published: 18 March 2022

## Electronic Supporting Materials:

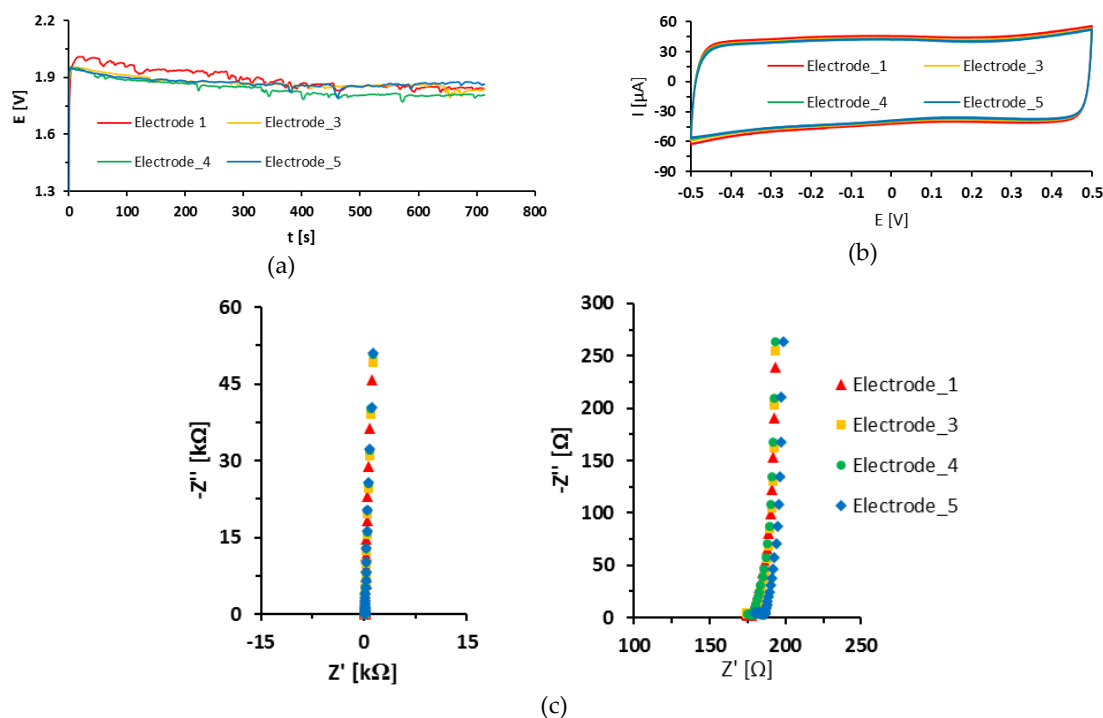

**Figure S1.** Characterization of GC/PEDOT electrodes without ISM: chronopotentiometric traces recorded during electrodeposition of PEDOT on GC from 0.01 M-EDOT solution containing 0.1 M KCl (a); CV traces of GC/PEDOT electrodes (5<sup>th</sup> cycle) recorded in 0.1 M NaClO<sub>4</sub> (scan rate 0.1 V.s<sup>-1</sup>) (b); impedance spectra of GC/PEDOT electrodes in 0.1 M NaClO<sub>4</sub> measured in the frequency range 10 kHz-10 mHz (left) 10 kHz-2 Hz (right) at  $E_{dc} = 200$  mV and ac amplitude = 10 mV(c).

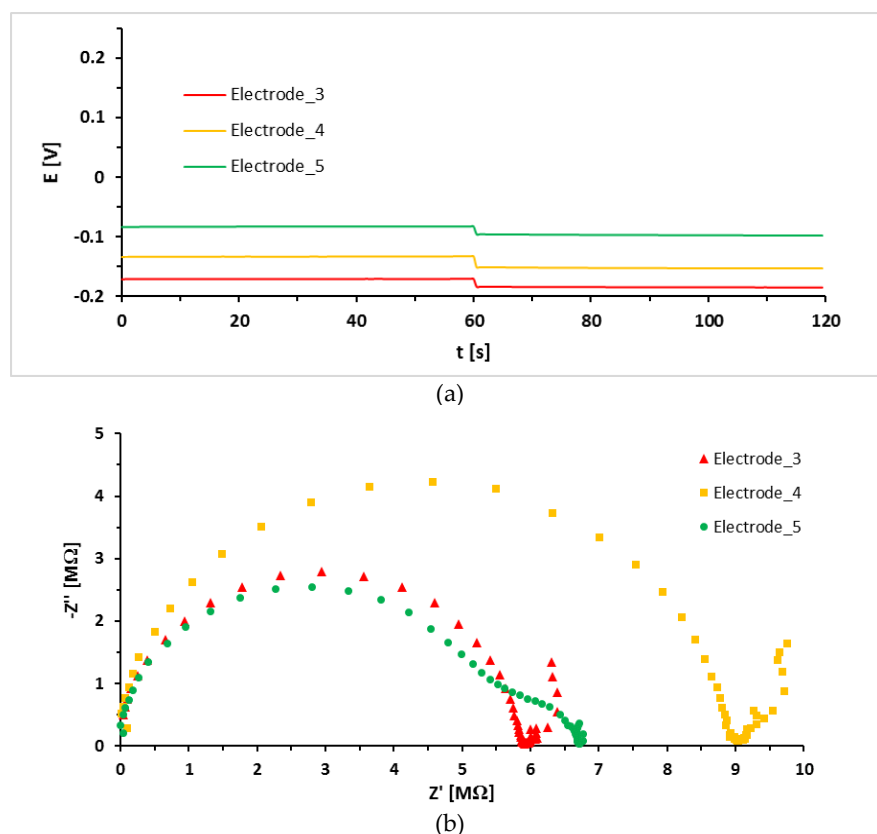

**Figure S2.** GC/PEDOT/ISM electrodes with ISM containing BBU (the composition is given in Tables 1 and 2): chronopotentiometric traces recorded in 0.1 M NaClO<sub>4</sub> solution at an applied current of +1 nA (0–60 s) and -1 nA (60–120 s) (a); impedance spectra of GC/PEDOT/ISM electrodes in 0.1 M NaClO<sub>4</sub> measured in the frequency range 100 kHz–10 mHz at  $E_{dc} = 200$  mV and ac amplitude = 100 mV (b).

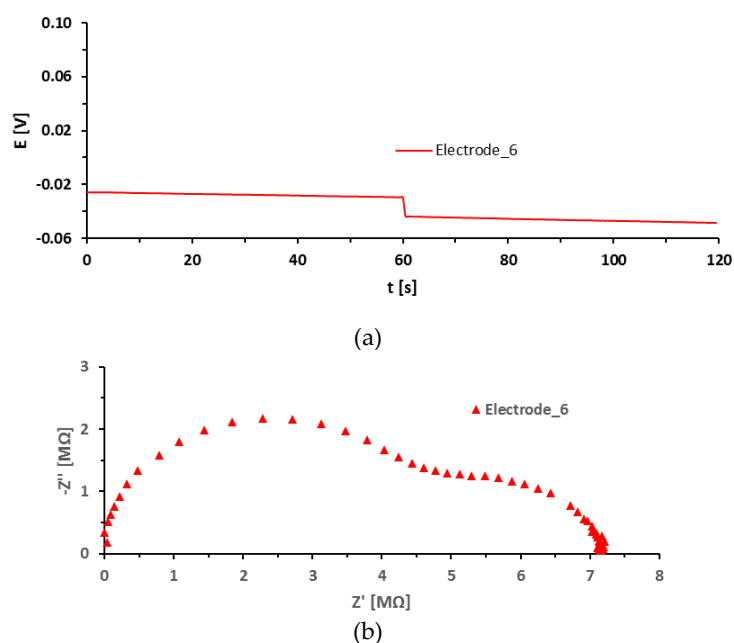

**Figure S3.** GC/PEDOT/ISM electrode with ISM containing BBU (the composition is given in Tables 1 and 2) conditioned in 0.1 M NaClO<sub>4</sub>: chronopotentiometric traces recorded in 0.1 M NaClO<sub>4</sub> at an applied current of +1 nA (0–60 s) and -1 nA (60–120 s) (a); impedance spectra of GC/PEDOT/ISM in 0.1 M NaClO<sub>4</sub> measured in the frequency range 100 kHz–10 mHz at  $E_{dc} = 200$  mV and ac amplitude = 100 mV (b).

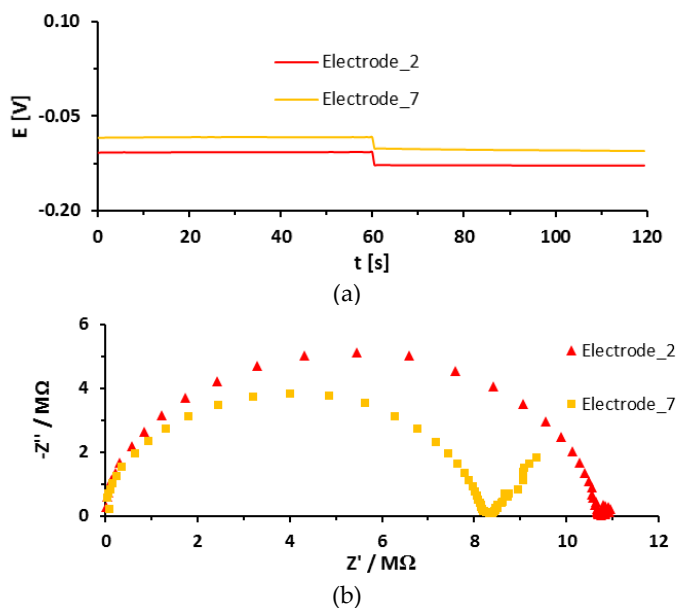

**Figure S4.** GC/PEDOT/ISM electrodes with ISM in absence and presence of BBU (the composition is given in Tables 1 and 2): chronopotentiometric traces recorded in 0.1 M NaClO<sub>4</sub> at an applied current of +1 nA (0–60 s) and -1 nA (60–120 s) (a); impedance spectra of GC/PEDOT/ISM in 0.1 M NaClO<sub>4</sub> measured in the frequency range 100 kHz–10 mHz at  $E_{dc} = 200$  mV and ac amplitude = 100 mV (b).

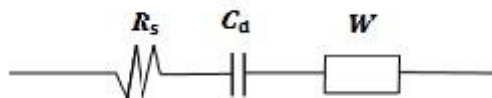

**Scheme S1.** The equivalent electrical circuit model for the GC/PEDOT(Cl) electrode without ISM, where  $R_s$  is solution resistance (+ PEDOT ohmic resistance),  $C_d$  bulk (electronic) capacitance and  $W$  finite-length Warburg diffusion impedance – see ref. [Bobacka, J.; Lewenstam, A.; Ivaska, A. Electrochemical impedance spectroscopy of oxidized poly(3,4-ethylenedioxythiophene) film electrodes in aqueous solutions. *J. Electroanal. Chem.* **2000**, 489, 17–27].

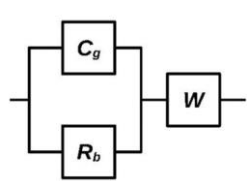

**Scheme S2.** The equivalent circuit model for the GC/PEDOT/ISM electrode, where  $R_b$  is the membrane (ISM) bulk resistance,  $C_g$  is the membrane (ISM) geometric capacitance, and  $W$  is the Warburg diffusion element [Ding R.; Joon, N.K.; Ahamed, A.; Shafaat, A.; Guzinski, M.; Wagner, M.; Ruzgas, T.; Bobacka, J.; Lisak, G. Gold-modified paper as microfluidic substrates with reduced biofouling in potentiometric ion sensing. *Sens. Actuators B. Chem.* **2021**, 344, 130200.].

**Publisher's Note:** MDPI stays neutral with regard to jurisdictional claims in published maps and institutional affiliations.

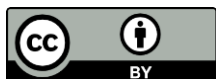

© 2022 by the authors. Submitted for possible open access publication under the terms and conditions of the Creative Commons Attribution (CC BY) license (<http://creativecommons.org/licenses/by/4.0/>).
